# Supplementary material for: Effects of Forest Fragmentation on Connectivity and Genetic Diversity in an Endemic and an Invasive Rodent in Northwestern Madagascar
Source: MDPI journal article supplement (doi:10.3390/genes14071451), 2023-07-15
Supplement: s1 [file s1]

#### Table S1

##### Study Site Locations

Name, geographic coordinates, and basic information for each study site where individuals were captured.

#### Table S2

##### Individual Genomic and Geographic Data

All samples used in final analyses with individual IDs, species, location (ANP or MCF), loci, depth, and XY coordinates.

#### Table S3

##### ADMIXTURE Output

CV error results from the ADMIXTURE program for each species on each landscape and the combined sample for populations K=1-10 used to determine the best value of K. Admixture figures are also shown for each species overall which was used to justify analyses on each location independently.

#### Table S4

##### Correlation Values for Analyses

Results of Spearman Rank correlation test between continuous predictor variables used for modeling. Significant values are in bold.

#### Table S5

##### Details on related individuals

Identity, Euclidean distance and coefficient of relatedness for all dyads with  $r > 0$  in *E. myoxinus* and *R. rattus*

#### Table S6

##### GAM Outputs

Factors influencing the abundance of four species according to model selection based on delta AICc ( $\Delta AICc$ ) and AICc weights. K: the number of parameters in the model, LogLik: the maximized logarithmic likelihood,  $\Delta AICc$  is the deviance of a model from the model with the lowest AICc,  $\omega$ : the Akaike's

Information Criterion corrected weights. Tables are presented per variable ( $F_{IS}$ ,  $H_O$ ,  $H_E$ ). See table 1 for input of each model (A-E).
