# Supplementary material for: Effects of Forest Fragmentation on Connectivity and Genetic Diversity in an Endemic and an Invasive Rodent in Northwestern Madagascar
Source: Genes (Basel). 2023 Jul 15;14(7):1451. doi: 10.3390/genes14071451 (PMC10378931; doi:10.3390/genes14071451)
Supplement: Supplementary file 1 [file genes-14-01451-s001.zip]

Archive with 7 entries (7 files):
- Supplementary Legends.pdf
- Table S1.xlsx
- Table S2.xlsx
- Table S3.xlsx
- Table S4.xlsx
- Table S5.xlsx
- Table S6.xlsx
