# Supplementary material for: Effects of Forest Fragmentation on Connectivity and Genetic Diversity in an Endemic and an Invasive Rodent in Northwestern Madagascar
Source: Genes (Basel). 2023 Jul 15;14(7):1451. doi: 10.3390/genes14071451 (PMC10378931; doi:10.3390/genes14071451)
Supplement: Supplementary file 1 [file genes-14-01451-s001.zip › Table S2.xlsx]

## Sheet: Sheet1
ID	Species	# Loci	Depth	Location	Site	O_HET	E_HET	FIS	Sex	Body Mass	Forest Area	Distance to Continuous Forest	Distance to Edge	Edge Percentage	Admixture Analyses	Relatedness Analyses	Landscape Analyses	Modelling all	Modelling (Subset)	Notes
F01Y17_JABE	E. myoxinus	59048	11.8888	ANP	C20A	0.238907	0.248955	0.04036	F	0.741	130390	0	221	NA	Y	Y	Y	Y	N	Excluded from modeling: from continuous forest site
F103Y17_JABE	E. myoxinus	55093	6.71824	ANP	3FN	0.215182	0.248899	0.13546	F	0.431	114.6	978	107	0.38	Y	Y	Y	Y	Y
F105Y17_JABE	E. myoxinus	51659	6.71389	ANP	1FS	0.215529	0.249755	0.13704	F	0.603	36.93	2228	118	0.5	Y	Y	Y	Y	Y
F113Y17_JABE	E. myoxinus	49208	5.09051	ANP	1FN	0.197041	0.246931	0.20204	F	0.5	36.93	2228	58	0.5	Y	Y	Y	Y	Y
F114_17_JABE	E. myoxinus	57737	13.5355	ANP	1FS	0.233559	0.24936	0.06337	F	0.155	36.93	2228	120	0.5	Y	Y	Y	Y	Y
F117Y18_JABE	E. myoxinus	59691	12.3113	ANP	31F	0.185003	0.249021	0.25708	F	0.448	17.79	1220	25	0.52	Y	Y	Y	Y	Y
F118Y17_JABE	E. myoxinus	53359	5.05099	ANP	3FN	0.201091	0.246365	0.18377	F	0.638	114.6	978	113	0.38	Y	Y	Y	Y	Y
F119Y18_JABE	E. myoxinus	57216	10.1715	ANP	39F	NA	NA	NA	F	NA	NA	NA	NA	NA	Y	Y	Y	N	N	Excluded from modeling: ecological data missing for individual
F11Y04_KELY	E. myoxinus	56081	7.1715	ANP	KELY	NA	NA	NA	F	NA	NA	NA	NA	NA	Y	N	N	N	N	Excluded from modeling and landscape analyses: individuals from other landscape for comparison
F127Y18_JABE	E. myoxinus	57324	10.8013	ANP	39F	NA	NA	NA	F	NA	NA	NA	NA	NA	Y	Y	Y	N	N	Excluded from modeling: ecological data missing for individual
F128_18_JABE	E. myoxinus	57974	23.8179	ANP	39F	NA	NA	NA	F	NA	NA	NA	NA	NA	Y	Y	Y	N	N	Excluded from modeling: ecological data missing for individual
F12Y04_KELY	E. myoxinus	56413	6.71389	ANP	KELY	NA	NA	NA	F	NA	NA	NA	NA	NA	Y	N	N	N	N	Excluded from modeling and landscape analyses: individuals from other landscape for comparison
F132_17_JABE	E. myoxinus	56292	8.9628	ANP	12aF	0.224455	0.249133	0.09906	F	0.241	14.16	690	17	0.77	Y	Y	Y	Y	Y
F135Y17_JABE	E. myoxinus	54754	6.5747	ANP	15F	0.21697	0.248871	0.12818	F	0.655	1.19	2500	31	1	Y	Y	Y	Y	Y
F147Y17_JABE	E. myoxinus	50747	6.00152	ANP	8F	0.211796	0.249329	0.15053	F	0.621	13.77	1152	38	0.69	Y	Y	Y	Y	Y
F14Y04_KELY	E. myoxinus	56123	8.3113	ANP	KELY	NA	NA	NA	F	NA	NA	NA	NA	NA	Y	N	N	N	N	Excluded from modeling and landscape analyses: individuals from other landscape for comparison
F165Y17_JABE	E. myoxinus	54164	6.42275	ANP	5F	0.21806	0.249252	0.12514	F	0.224	15.39	1245	73	0.67	Y	Y	Y	Y	Y
F167_17_JABE	E. myoxinus	57482	12.662	ANP	12aF	0.235883	0.249346	0.05399	F	0.397	14.16	690	17	0.77	Y	Y	Y	Y	Y
F170Y17_JABE	E. myoxinus	56574	9.3931	ANP	19F	0.227772	0.248929	0.08499	F	0.155	1.41	1076	4	1	Y	Y	Y	Y	Y
F171Y17_JABE	E. myoxinus	54699	6.08156	ANP	8F	0.219492	0.248831	0.11791	F	0.569	13.77	1152	38	0.69	Y	Y	Y	Y	Y
F173Y17_JABE	E. myoxinus	57442	10.0444	ANP	5F	0.221963	0.249478	0.11029	F	0.862	15.39	1245	11	0.67	Y	Y	Y	Y	Y
F179_17_JABE	E. myoxinus	57709	12.5712	ANP	5F	0.236185	0.249512	0.05341	F	0.81	15.39	1245	68	0.67	Y	Y	Y	Y	Y
F189_17_JABE	E. myoxinus	57849	13.2339	ANP	19F	0.22723	0.2495	0.08926	F	0.19	1.41	1076	21	1	Y	Y	Y	Y	Y
F194Y17_JABE	E. myoxinus	57012	12.783	ANP	6F	0.22711	0.249467	0.08962	F	0.638	11.53	213	90	0.57	Y	Y	Y	Y	Y
F198Y17_JABE	E. myoxinus	59091	13.2588	ANP	20F	0.24909	0.249143	0.00021	F	0.793	1.47	195	40	1	Y	Y	Y	Y	Y
F199Y17_JABE	E. myoxinus	50477	5.74785	ANP	C20A	0.210076	0.249006	0.15634	F	0.465	130390	0	146	NA	Y	Y	Y	Y	N	Excluded from modeling: from continuous forest site
F217_JABE	E. myoxinus	56762	10.0895	ANP	C20A	0.223089	0.249343	0.10529	F	0.293	130390	0	231	NA	Y	Y	Y	Y	N	Excluded from modeling: from continuous forest site
F24Y04_ANDO	E. myoxinus	56619	6.81824	ANP	ANDO	NA	NA	NA	F	NA	NA	NA	NA	NA	Y	N	N	N	N	Excluded from modeling and landscape analyses: individuals from other landscape for comparison
F36Y04_ANDO	E. myoxinus	56005	5.05099	ANP	ANDO	NA	NA	NA	F	NA	NA	NA	NA	NA	Y	N	N	N	N	Excluded from modeling and landscape analyses: individuals from other landscape for comparison
F417_JABE	E. myoxinus	57983	14.1694	ANP	6F	0.238208	0.249373	0.04478	F	0.724	11.53	213	104	0.57	Y	Y	Y	Y	Y
F4517_JABE	E. myoxinus	57408	11.4235	ANP	4F	0.219151	0.24931	0.12097	F	0.379	18.48	1350	154	0.45	Y	Y	Y	Y	Y
F60Y17_JABE	E. myoxinus	50766	5.25675	ANP	19F	0.209235	0.24788	0.15591	F	0.69	1.41	1076	21	1	Y	Y	Y	Y	Y
F69Y17_JABE	E. myoxinus	56414	13.204	ANP	9F	0.238912	0.248998	0.04051	F	0.465	14.93	145	81	0.69	Y	Y	Y	Y	Y
F70Y17_JABE	E. myoxinus	52055	5.06582	ANP	9F	0.20292	0.246491	0.17677	F	0.293	14.93	145	77	0.69	Y	Y	Y	Y	Y
F72Y17_JABE	E. myoxinus	52873	5.91841	ANP	C9B	0.210334	0.248354	0.15309	F	0.638	130390	0	585	NA	Y	Y	Y	Y	N	Excluded from modeling: from continuous forest site
F73Y17_JABE	E. myoxinus	42855	5.48473	ANP	C9B	0.186466	0.245729	0.24117	F	0.379	130390	0	585	NA	Y	Y	Y	Y	N	Excluded from modeling: from continuous forest site
F83Y17_JABE	E. myoxinus	56775	7.26457	ANP	9F	0.221083	0.248914	0.11181	F	0.224	14.93	145	99	0.69	Y	Y	Y	Y	Y
F85Y18_JABE	E. myoxinus	56176	10.5457	ANP	C35	0.227909	0.248496	0.08285	F	0.586	130390	0	116	NA	Y	Y	Y	Y	N	Excluded from modeling: from continuous forest site
F91Y17_JABE	E. myoxinus	45030	5.47226	ANP	3FN	0.182745	0.244772	0.25341	F	0.603	114.6	978	192	0.38	Y	Y	Y	Y	Y
F92Y17_JABE	E. myoxinus	53540	5.82647	ANP	3FN	0.210553	0.248166	0.15157	F	0.759	114.6	978	77	0.38	Y	Y	Y	Y	Y
F92Y18_JABE	E. myoxinus	59407	12.8785	ANP	38F	0.242547	0.249018	0.02598	F	0.586	1.07	1030	9	1	Y	Y	Y	Y	Y
F96Y17_JABE	E. myoxinus	56073	6.67516	ANP	1FN	0.226187	0.248389	0.08938	F	0.621	36.93	2228	41	0.5	Y	Y	Y	Y	Y
M111Y18_JABE	E. myoxinus	56230	9.01974	ANP	39F	NA	NA	NA	M	NA	NA	NA	NA	NA	Y	Y	Y	N	N	Excluded from modeling: ecological data missing for individual
M12318_JABE	E. myoxinus	58635	23.618	ANP	31F	0.242159	0.248984	0.02741	M	0.638	17.79	1220	50	0.52	Y	Y	Y	Y	Y
M125Y17_JABE	E. myoxinus	45891	5.62642	ANP	15F	0.191759	0.245963	0.22038	M	0.552	1.19	2500	30	1	Y	Y	Y	Y	Y
M13617_JABE	E. myoxinus	51778	9.15433	ANP	2FS	0.197033	0.251143	0.21546	M	0.379	47.69	724	135	0.62	Y	Y	Y	Y	Y
M143Y17_JABE	E. myoxinus	56342	10.1664	ANP	9F	NA	NA	NA	M	NA	NA	NA	NA	NA	Y	Y	Y	N	N	Excluded from modeling: ecological data missing for individual
M14417_JABE	E. myoxinus	57761	16.0181	ANP	12aF	0.235488	0.249481	0.05609	M	0.534	14.16	690	39	0.77	Y	Y	Y	Y	Y
M155Y17_JABE	E. myoxinus	55254	8.00552	ANP	5F	0.221323	0.249557	0.11313	M	0.155	15.39	1245	73	0.67	Y	Y	Y	Y	Y
M15817_JABE	E. myoxinus	57607	11.2864	ANP	8F	0.235683	0.24923	0.05436	M	0.586	13.77	1152	96	0.69	Y	Y	Y	Y	Y
M176Y17_JABE	E. myoxinus	56612	9.47167	ANP	1FS	0.230605	0.249149	0.07443	M	0.328	36.93	2228	121	0.5	Y	Y	Y	Y	Y
M184Y17_JABE	E. myoxinus	55539	7.03257	ANP	C20B	0.217289	0.249034	0.12748	M	0.586	130390	0	148	NA	Y	Y	Y	Y	N	Excluded from modeling: from continuous forest site
M190Y17_JABE	E. myoxinus	49860	5.47202	ANP	C20A	NA	NA	NA	M	NA	NA	NA	NA	NA	Y	Y	Y	N	N	Excluded from modeling: ecological data missing for individual
M191Y17_JABE	E. myoxinus	59901	11.3237	ANP	6F	0.239979	0.24922	0.03708	M	0.845	11.53	213	34	0.57	Y	Y	Y	Y	Y
M20Y04_KELY	E. myoxinus	55970	6.09051	ANP	KELY	NA	NA	NA	M	NA	NA	NA	NA	NA	Y	N	N	N	N	Excluded from modeling and landscape analyses: individuals from other landscape for comparison
M517_JABE	E. myoxinus	58859	13.9223	ANP	6F	0.213272	0.24935	0.14469	M	0.345	11.53	213	104	0.57	Y	Y	Y	Y	Y
M94Y17_JABE	E. myoxinus	58297	14.7258	ANP	3FN	0.248246	0.248773	0.00211	M	0.552	114.6	978	113	0.38	Y	Y	Y	Y	Y
M99Y17_JABE	E. myoxinus	48418	5.38093	ANP	3FN	0.183382	0.24419	0.24902	M	0.5	114.6	978	68	0.38	Y	Y	Y	Y	Y
F09Y18_MARI	E. myoxinus	64210	8.67466	MCF	C4B	0.24152	0.299922	0.19473	F	0.138	4240	0	920	NA	Y	Y	Y	Y	N	Excluded from modeling: from continuous forest site
F24Y18_MARI	E. myoxinus	66107	9.48108	MCF	CF1	NA	NA	NA	F	NA	NA	NA	NA	NA	Y	Y	Y	N	N	Excluded from modeling: captured at site with no ecological data recorded
F38Y18_MARI	E. myoxinus	53070	9.09077	MCF	C4B	0.216789	0.296804	0.26959	F	0.862	4240	0	619	NA	Y	Y	Y	Y	N	Excluded from modeling: from continuous forest site
F60Y18_MARI	E. myoxinus	69597	12.3929	MCF	13SF	0.257267	0.300394	0.14357	F	0.707	6.64	258	87	0.7	Y	Y	Y	Y	Y
F61Y18_MARI	E. myoxinus	66830	11.0592	MCF	C6A	0.240177	0.300198	0.19994	F	0.328	5852.22	0	92	NA	Y	Y	Y	Y	N	Excluded from modeling: from continuous forest site
F63Y18_MARI	E. myoxinus	66903	9.73583	MCF	12SF	0.250198	0.300179	0.16651	F	0.655	3.69	211	57	0.83	Y	Y	Y	Y	Y
F7018_MARI	E. myoxinus	65846	9.89775	MCF	C6A	0.244069	0.3	0.18644	F	0.741	5852.22	0	199	NA	Y	Y	Y	Y	N	Excluded from modeling: from continuous forest site
F76Y18_MARI	E. myoxinus	66901	10.8588	MCF	C7	0.253703	0.300208	0.15491	F	0.638	5852.22	0	73	NA	Y	Y	Y	Y	N	Excluded from modeling: from continuous forest site
M23Y18_MARI	E. myoxinus	66135	10.8615	MCF	CF1	NA	NA	NA	M	NA	NA	NA	NA	NA	Y	Y	Y	N	N	Excluded from modeling: captured at site with no ecological data recorded
M31Y18_MARI	E. myoxinus	66640	10.5375	MCF	C4A	0.237755	0.300186	0.20797	M	0.629	4240	0	301	NA	Y	Y	Y	Y	N	Excluded from modeling: from continuous forest site
M56Y18_MARI	E. myoxinus	64689	8.56775	MCF	C5A	0.235125	0.299634	0.21529	M	0.586	4240	0	431	NA	Y	Y	Y	Y	N	Excluded from modeling: from continuous forest site
M57Y18_MARI	E. myoxinus	67547	10.6511	MCF	12SF	0.24383	0.300238	0.18788	M	0.638	3.69	211	65	0.83	Y	Y	Y	Y	Y
M58Y18_MARI	E. myoxinus	67085	10.3596	MCF	13SF	0.242647	0.300407	0.19227	M	0.621	6.64	258	87	0.7	Y	Y	Y	Y	Y
M66Y18_MARI	E. myoxinus	66122	9.08664	MCF	C6A	0.246181	0.299874	0.17905	M	0.655	5852.22	0	46	NA	Y	Y	Y	Y	N	Excluded from modeling: from continuous forest site
F102Y17_JABE	R. rattus	40542	5.40477	ANP	3FN	0.276903	0.303805	0.08855	F	0.356	114.6	978	85	0.38	Y	Y	Y	Y	Y
F133Y17_JABE	R. rattus	41071	12.0457	ANP	15F	0.307129	0.309234	0.0068	F	0.644	1.19	2500	32	1	Y	Y	Y	Y	Y
F134Y17_JABE	R. rattus	41846	19.425	ANP	19F	0.301403	0.308698	0.02363	F	0.404	1.41	1076	1	1	Y	Y	Y	Y	Y
F148Y17_JABE	R. rattus	42125	7.97785	ANP	3FS	0.30433	0.307829	0.01137	F	0.459	114.6	978	93	0.38	Y	Y	Y	Y	Y
F149Y17_JABE	R. rattus	43257	10.7677	ANP	3FS	0.300351	0.309805	0.03052	F	0.466	114.6	978	95	0.38	Y	Y	Y	Y	Y
F151Y17_JABE	R. rattus	43414	10.9436	ANP	7F	0.296096	0.309699	0.04393	F	0.26	3.53	1396	41	0.93	Y	Y	Y	Y	Y
F154Y17_JABE	R. rattus	43868	6.66528	ANP	5F	0.214267	0.30715	0.3024	F	0.486	15.39	1245	75	0.67	Y	Y	Y	Y	Y
F160Y17_JABE	R. rattus	44030	7.20352	ANP	8F	0.262444	0.30716	0.14558	F	0.48	13.77	1152	34	0.69	Y	Y	Y	Y	Y
F172Y17_JABE	R. rattus	44261	8.2814	ANP	8F	0.289759	0.309519	0.06384	F	0.404	13.77	1152	84	0.69	Y	Y	Y	Y	Y
F175Y17_JABE	R. rattus	44305	8.78614	ANP	8F	0.283974	0.3094	0.08218	F	0.541	13.77	1152	31	0.69	Y	Y	Y	Y	Y
F178Y17_JABE	R. rattus	45279	10.9959	ANP	1FS	0.284973	0.309551	0.0794	F	0.384	36.93	2228	75	0.5	Y	Y	Y	Y	Y
F195Y17_JABE	R. rattus	46080	7.23811	ANP	6F	0.268726	0.308581	0.12915	F	0.418	11.53	213	72	0.57	Y	Y	Y	Y	Y
F50Y17_JABE	R. rattus	46411	10.5322	ANP	9F	NA	NA	NA	F	NA	NA	NA	NA	NA	Y	Y	Y	N	N	Excluded from modeling: ecological data missing for individual
F58Y17_JABE	R. rattus	46416	6.0351	ANP	C9B	0.275234	0.305966	0.10044	F	0.514	130390	0	663	NA	Y	Y	Y	Y	N	Excluded from modeling: from continuous forest site
F61Y17_JABE	R. rattus	46762	17.4595	ANP	C9A	0.298027	0.308764	0.03477	F	0.356	130390	0	75	NA	Y	Y	Y	Y	N	Excluded from modeling: from continuous forest site
F65Y17_JABE	R. rattus	46806	9.124	ANP	C9A	0.295269	0.309933	0.04731	F	0.473	130390	0	187	NA	Y	Y	Y	Y	N	Excluded from modeling: from continuous forest site
F88Y17_JABE	R. rattus	46810	5.85521	ANP	15F	0.278027	0.30578	0.09076	F	0.137	1.19	2500	32	1	Y	Y	Y	Y	Y
F89Y18_JABE	R. rattus	46902	9.69597	ANP	35F	NA	NA	NA	F	NA	NA	NA	NA	NA	Y	Y	Y	N	N	Excluded from modeling: ecological data missing for individual
M101Y17_JABE	R. rattus	47120	7.83667	ANP	3FN	0.304112	0.30814	0.01307	M	0.226	114.6	978	114	0.38	Y	Y	Y	Y	Y
M103Y18_JABE	R. rattus	47166	10.7628	ANP	31F	0.287092	0.3078	0.06728	M	0.74	17.79	1220	74	0.52	Y	Y	Y	Y	Y
M111Y17_JABE	R. rattus	47283	8.14874	ANP	1FN	0.294934	0.309093	0.04581	M	0.185	36.93	2228	43	0.5	Y	Y	Y	Y	Y
M119Y17_JABE	R. rattus	47363	7.03971	ANP	3FN	0.285895	0.307917	0.07152	M	0.617	114.6	978	78	0.38	Y	Y	Y	Y	Y
M120Y17_JABE	R. rattus	47382	14.1978	ANP	3FN	0.303154	0.308894	0.01858	M	0.678	114.6	978	68	0.38	Y	Y	Y	Y	Y
M122Y18_JABE	R. rattus	47420	6.49994	ANP	31F	0.26554	0.306908	0.13479	M	0.397	17.79	1220	138	0.52	Y	Y	Y	Y	Y
M157Y17_JABE	R. rattus	47691	7.7109	ANP	8F	NA	NA	NA	M	NA	NA	NA	NA	NA	Y	Y	Y	N	N	Excluded from modeling: ecological data missing for individual
M161Y17_JABE	R. rattus	47721	9.35173	ANP	7F	0.300771	0.309342	0.02771	M	0.493	3.53	1396	58	0.93	Y	Y	Y	Y	Y
M162Y17_JABE	R. rattus	47748	6.37396	ANP	3FS	0.286257	0.307591	0.06936	M	0.678	114.6	978	93	0.38	Y	Y	Y	Y	Y
M166Y17_JABE	R. rattus	48102	10.2605	ANP	5F	0.312456	0.309354	-0.01003	M	0.37	15.39	1245	119	0.67	Y	Y	Y	Y	Y
M168Y17_JABE	R. rattus	48147	7.60745	ANP	3FS	0.296809	0.308853	0.039	M	0.37	114.6	978	119	0.38	Y	Y	Y	Y	Y
M169Y17_JABE	R. rattus	48276	8.52834	ANP	3FS	0.280455	0.309207	0.09299	M	0.493	114.6	978	118	0.38	Y	Y	Y	Y	Y
M174Y17_JABE	R. rattus	48380	11.5915	ANP	10F	0.291653	0.309155	0.05661	M	0.473	2.72	114	38	1	Y	Y	Y	Y	Y
M177Y17_JABE	R. rattus	48422	12.3622	ANP	1FS	0.300634	0.309335	0.02813	M	0.521	36.93	2228	122	0.5	Y	Y	Y	Y	Y
M180Y17_JABE	R. rattus	48570	5.48392	ANP	5F	0.267552	0.305408	0.12395	M	0.596	15.39	1245	64	0.67	Y	Y	Y	Y	Y
M185Y17_JABE	R. rattus	48671	16.3259	ANP	10F	0.311009	0.309134	-0.00607	M	0.678	2.72	114	41	1	Y	Y	Y	Y	Y
M187Y17_JABE	R. rattus	48702	8.53674	ANP	C20A	0.280841	0.308908	0.09086	M	0.76	130390	0	320	NA	Y	Y	Y	Y	N	Excluded from modeling: from continuous forest site
M188Y17_JABE	R. rattus	48736	12.9713	ANP	C20A	0.295984	0.309295	0.04304	M	0.39	130390	0	258	NA	Y	Y	Y	Y	N	Excluded from modeling: from continuous forest site
M52Y17_JABE	R. rattus	48860	8.14786	ANP	9F	0.290485	0.308667	0.05891	M	0.5	14.93	145	70	0.69	Y	Y	Y	Y	Y
M64Y17_JABE	R. rattus	48885	9.23088	ANP	C9A	0.295268	0.309461	0.04586	M	0.473	130390	0	455	NA	Y	Y	Y	Y	N	Excluded from modeling: from continuous forest site
M71Y17_JABE	R. rattus	48952	18.1479	ANP	9F	0.301811	0.308968	0.02317	M	0.411	14.93	145	70	0.69	Y	Y	Y	Y	Y
M74Y17_JABE	R. rattus	49005	7.18607	ANP	19F	0.29274	0.308225	0.05024	M	0.671	1.41	1076	1	1	Y	Y	Y	Y	Y
M79Y17_JABE	R. rattus	49009	7.6251	ANP	C9A	0.297586	0.308759	0.03619	M	0.5	130390	0	177	NA	Y	Y	Y	Y	N	Excluded from modeling: from continuous forest site
M80Y17_JABE	R. rattus	49024	11.7472	ANP	C9A	0.308911	0.309533	0.00201	M	0.247	130390	0	431	NA	Y	Y	Y	Y	N	Excluded from modeling: from continuous forest site
M91Y18_JABE	R. rattus	49097	7.98935	ANP	38F	0.286733	0.305837	0.06247	M	0.569	1.07	1030	8	1	Y	Y	Y	Y	Y
F02Y18_MARI	R. rattus	34451	13.4629	MCF	8SF	0.278225	0.30904	0.09971	F	0.26	7.2	510	79	0.63	Y	Y	Y	Y	Y
F03Y18_MARI	R. rattus	35609	11.1007	MCF	8SF	0.294204	0.308665	0.04685	F	0.26	7.2	510	79	0.63	Y	Y	Y	Y	Y
F06Y18_MARI	R. rattus	38958	8.55962	MCF	8SF	0.285073	0.307424	0.07271	F	0.527	7.2	510	116	0.63	Y	Y	Y	Y	Y
F07Y18_MARI	R. rattus	41377	9.88837	MCF	5SF	0.287245	0.308144	0.06782	F	0.726	3.04	890	57	0.96	Y	Y	Y	Y	Y
F10Y18_MARI	R. rattus	41714	6.70206	MCF	C4B	0.263093	0.305687	0.13934	F	0.658	4240	0	376	NA	Y	Y	Y	Y	N	Excluded from modeling: from continuous forest site
F11Y18_MARI	R. rattus	42766	6.76418	MCF	C4B	0.264721	0.303648	0.12819	F	0.007	4240	0	678	NA	Y	Y	Y	Y	N	Excluded from modeling: from continuous forest site
F12Y18_MARI	R. rattus	43250	10.9559	MCF	5SF	0.287313	0.308537	0.06879	F	0.151	3.04	890	5	0.96	Y	Y	Y	Y	Y
F17Y18_MARI	R. rattus	44932	11.5547	MCF	RIVD	NA	NA	NA	F	NA	NA	NA	NA	NA	Y	Y	Y	N	N	Excluded from modeling: captured at site with no ecological data recorded
F22Y18_MARI	R. rattus	45160	7.459	MCF	CF1	NA	NA	NA	F	NA	NA	NA	NA	NA	Y	Y	Y	N	N	Excluded from modeling: captured at site with no ecological data recorded
F25Y18_MARI	R. rattus	45253	7.43961	MCF	RIVD	NA	NA	NA	F	NA	NA	NA	NA	NA	Y	Y	Y	N	N	Excluded from modeling: captured at site with no ecological data recorded
F27Y18_MARI	R. rattus	46751	7.46644	MCF	RIVD	NA	NA	NA	F	NA	NA	NA	NA	NA	Y	Y	Y	N	N	Excluded from modeling: captured at site with no ecological data recorded
F32Y18_MARI	R. rattus	47028	15.0402	MCF	6SF	0.280606	0.308591	0.09068	F	0.569	9.4	410	51	0.9	Y	Y	Y	Y	Y
F34Y18_MARI	R. rattus	47040	9.09463	MCF	C4B	0.287057	0.30775	0.06724	F	0.082	4240	0	732	NA	Y	Y	Y	Y	N	Excluded from modeling: from continuous forest site
F35Y18_MARI	R. rattus	47142	6.53919	MCF	C4B	0.273947	0.305134	0.10221	F	0.466	4240	0	634	NA	Y	Y	Y	Y	N	Excluded from modeling: from continuous forest site
F46Y18_MARI	R. rattus	47223	11.3111	MCF	RIVF	NA	NA	NA	F	NA	NA	NA	NA	NA	Y	Y	Y	N	N	Excluded from modeling: captured at site with no ecological data recorded
F50Y18_MARI	R. rattus	47332	12.3137	MCF	RIVH	0.279588	0.308377	0.09336	F	0.774	86.7	0	51	0.81	Y	Y	Y	Y	Y
F64Y18_MARI	R. rattus	47576	12.4815	MCF	12SF	0.289902	0.308596	0.06058	F	0.589	3.69	211	5	0.83	Y	Y	Y	Y	Y
F67Y18_MARI	R. rattus	47927	12.4482	MCF	C6B	0.281172	0.308454	0.08845	F	0.541	5852.22	0	483	NA	Y	Y	Y	Y	N	Excluded from modeling: from continuous forest site
F68Y18_MARI	R. rattus	48204	14.8372	MCF	C6B	0.293959	0.308595	0.04743	F	0.664	5852.22	0	609	NA	Y	Y	Y	Y	N	Excluded from modeling: from continuous forest site
F77Y18_MARI	R. rattus	48316	13.0365	MCF	14SF	NA	NA	NA	F	NA	NA	NA	NA	NA	Y	Y	Y	N	N	Excluded from modeling: ecological data missing for individual
M01Y18_MARI	R. rattus	48329	8.06234	MCF	C4A	0.27362	0.308003	0.11163	M	0.425	4240	0	67	NA	Y	Y	Y	Y	N	Excluded from modeling: from continuous forest site
M04Y18_MARI	R. rattus	48355	5.89528	MCF	8SF	0.256994	0.305008	0.15742	M	0.815	7.2	510	57	0.63	Y	Y	Y	Y	Y
M05Y18_MARI	R. rattus	48401	7.25073	MCF	8SF	0.251115	0.305727	0.17863	M	0.808	7.2	510	92	0.63	Y	Y	Y	Y	Y
M13Y18_MARI	R. rattus	48407	12.0152	MCF	RIVB	NA	NA	NA	M	NA	NA	NA	NA	NA	Y	Y	Y	N	N	Excluded from modeling: captured at site with no ecological data recorded
M15Y18_MARI	R. rattus	48412	7.60466	MCF	C4B	0.248843	0.306458	0.188	M	0.473	4240	0	397	NA	Y	Y	Y	Y	N	Excluded from modeling: from continuous forest site
M19Y18_MARI	R. rattus	48419	10.4111	MCF	RIVA	NA	NA	NA	M	NA	NA	NA	NA	NA	Y	Y	Y	N	N	Excluded from modeling: captured at site with no ecological data recorded
M20Y18_MARI	R. rattus	48426	10.6334	MCF	RIVA	NA	NA	NA	M	NA	NA	NA	NA	NA	Y	Y	Y	N	N	Excluded from modeling: captured at site with no ecological data recorded
M26Y18_MARI	R. rattus	48479	12.3301	MCF	RIVC	NA	NA	NA	M	NA	NA	NA	NA	NA	Y	Y	Y	N	N	Excluded from modeling: captured at site with no ecological data recorded
M28Y18_MARI	R. rattus	48492	12.5351	MCF	C4A	0.287614	0.308425	0.06748	M	0.375	4240	0	364	NA	Y	Y	Y	Y	N	Excluded from modeling: from continuous forest site
M39Y18_MARI	R. rattus	48513	14.3698	MCF	RIVF	NA	NA	NA	M	NA	NA	NA	NA	NA	Y	Y	Y	N	N	Excluded from modeling: captured at site with no ecological data recorded
M43Y18_MARI	R. rattus	48529	12.451	MCF	RIVH	0.292611	0.308631	0.05191	M	0.308	86.7	0	44	0.81	Y	Y	Y	Y	Y
M51Y18_MARI	R. rattus	48587	13.6	MCF	RIVFW	0.293991	0.308312	0.04645	M	0.219	86.7	0	48	0.81	Y	Y	Y	Y	Y
M53Y18_MARI	R. rattus	48616	12.0283	MCF	RIVG	NA	NA	NA	M	NA	NA	NA	NA	NA	Y	Y	Y	N	N	Excluded from modeling: captured at site with no ecological data recorded
M54Y18_MARI	R. rattus	48633	10.6832	MCF	RIVG	NA	NA	NA	M	NA	NA	NA	NA	NA	Y	Y	Y	N	N	Excluded from modeling: captured at site with no ecological data recorded
M62Y18_MARI	R. rattus	48638	10.3016	MCF	C6B	0.284474	0.30816	0.07686	M	0.808	5852.22	0	520	NA	Y	Y	Y	Y	N	Excluded from modeling: from continuous forest site
M72Y18_MARI	R. rattus	48641	10.33	MCF	14SF	0.262927	0.307823	0.14585	M	0.74	14.6	281	136	0.5	Y	Y	Y	Y	Y
M79Y18_MARI	R. rattus	48670	8.32802	MCF	15SF	0.286501	0.3075	0.06829	M	0.617	16.15	169	30	0.72	Y	Y	Y	Y	Y
M80Y18_MARI	R. rattus	48855	8.69693	MCF	15SF	0.277771	0.307674	0.09719	M	0.74	16.15	169	45	0.72	Y	Y	Y	Y	Y
