# Supplementary material for: Effects of Forest Fragmentation on Connectivity and Genetic Diversity in an Endemic and an Invasive Rodent in Northwestern Madagascar
Source: Genes (Basel). 2023 Jul 15;14(7):1451. doi: 10.3390/genes14071451 (PMC10378931; doi:10.3390/genes14071451)
Supplement: Supplementary file 1 [file genes-14-01451-s001.zip › Table S5.xlsx]

## Sheet: Sheet1
Species	Category	Relatedness (R)	Euclidean Distance	Individual 1	Individual 2
E. myoxinus	1	0.770982	2150	F83Y17_JABE	F118Y17_JABE
E. myoxinus	2	0.352964	40	F170Y17_JABE	F189Y17_JABE
E. myoxinus	2	0.346672	0	F165Y17_JABE	M155Y17_JABE
E. myoxinus	2	0.346186	0	F167Y17_JABE	F132Y17_JABE
E. myoxinus	2	0.334298	100	M191Y17_JABE	M5Y17_JABE
E. myoxinus	2	0.33225	130	F147Y17_JABE	M158Y17_JABE
E. myoxinus	2	0.325538	30	F165Y17_JABE	F179Y17_JABE
E. myoxinus	2	0.315402	30	M155Y17_JABE	F179Y17_JABE
E. myoxinus	2	0.310188	0	F171Y17_JABE	F147Y17_JABE
E. myoxinus	2	0.309284	130	F135Y17_JABE	M176Y17_JABE
E. myoxinus	2	0.297738	50	F105Y17_JABE	F114Y17_JABE
E. myoxinus	2	0.289756	10	F70Y17_JABE	F69Y17_JABE
E. myoxinus	2	0.286518	130	F171Y17_JABE	M158Y17_JABE
E. myoxinus	2	0.286492	460	F164Y17_JABE	M190Y17_JABE
E. myoxinus	2	0.2691	30	F60Y17_JABE	F170Y17_JABE
E. myoxinus	2	0.265158	0	F60Y17_JABE	F189Y17_JABE
E. myoxinus	2	0.24571	350	M176Y17_JABE	M125Y17_JABE
E. myoxinus	2	0.201454	290	F103Y17_JABE	F91Y17_JABE
E. myoxinus	3	0.117254	310	F92Y18_JABE	F127Y18_JABE
E. myoxinus	3	0.11195	330	F92Y18_JABE	F119Y18_JABE
E. myoxinus	3	0.0833112	1100	F85Y18_JABE	F119Y18_JABE
E. myoxinus	3	0.0537298	480	F96Y17_JABE	F114Y17_JABE
E. myoxinus	3	0.0345344	510	F60Y17_JABE	F147Y17_JABE
E. myoxinus	3	0.0257134	1400	F128Y18_JABE	M123Y18_JABE
E. myoxinus	3	0.00371916	490	F60Y17_JABE	M158Y17_JABE
E. myoxinus	3	0.00044193	510	F60Y17_JABE	F171Y17_JABE
R. rattus	1	0.416704	0	M174Y17_JABE	M185Y17_JABE
R. rattus	1	0.398318	70	M188Y17_JABE	M187Y17_JABE
R. rattus	1	0.376312	10	F148Y17_JABE	F149Y17_JABE
R. rattus	2	0.329936	100	F34Y18_MARI	F35Y18_MARI
R. rattus	2	0.31046	10	F11Y18_MARI	F34Y18_MARI
R. rattus	2	0.297992	10	M166Y17_JABE	F154Y17_JABE
R. rattus	2	0.284502	10	F11Y18_MARI	F35Y18_MARI
R. rattus	2	0.24833	60	F65Y17_JABE	M79Y17_JABE
R. rattus	3	0.133452	50	F172Y17_JABE	F175Y17_JABE
R. rattus	3	0.114323	50	M101Y17_JABE	F102Y17_JABE
R. rattus	3	0.0716072	40	M05Y18_MARI	M04Y18_MARI
R. rattus	3	0.0668966	310	M51Y18_MARI	F50Y18_MARI
R. rattus	3	0.0611642	270	M168Y17_JABE	F148Y17_JABE
R. rattus	3	0.0538992	70	F12Y18_MARI	F07Y18_MARI
R. rattus	3	0.0499034	260	M168Y17_JABE	F149Y17_JABE
R. rattus	3	0.0135478	680	F50Y17_JABE	M80Y17_JABE
